# Supplementary material for: AI-enabled Monitoring of Planar-Flow Casting of Amorphous Steel Foils
Source: Research Square preprint supplement (doi:10.21203/rs.3.rs-8042276/v1), 2025-11-20
Supplement: Supplementary file 1 [file 1d71de2ea508f727f0e2a123.pdf]

Table S1 | Experimental setup parameters. Details of casting runs and controlled process conditions.

| Parameter        | Range / Values               |
|------------------|------------------------------|
| Melt temperature | 1250–1350 °C                 |
| Wheel speed      | 8–12 rpm                     |
| Nozzle geometry  | Straight slit / tapered slit |
| Slit width       | 25–30 mm                     |
| Wheel diameter   | 296 mm                       |

Table S2 | Ridge analysis metrics across stable vs unstable runs.

| Condition | Ridge density (1/mm) | Mean ridge width (mm) | Surface unevenness (%) |
|-----------|----------------------|-----------------------|------------------------|
| Stable    | 4–5                  | 0.25 ± 0.02           | 10–15%                 |
| Unstable  | 6–9                  | 0.30 ± 0.05           | 40–60%                 |

Table S3 | Thermal profile metrics comparing stable vs unstable runs.

| Condition | Mean ΔT across foil (°C) | Edge-to-centre ∇T ratio |
|-----------|--------------------------|-------------------------|
| Stable    | 20–25 °C                 | ≈1.0                    |
| Unstable  | 40–60 °C                 | 1.5–2.0                 |

Table S4 | Hyperparameters for XGBoost and deep-learning fusion models.

| Model     | Parameter                | Value               |
|-----------|--------------------------|---------------------|
| XGBoost   | Learning rate            | 0.05                |
| XGBoost   | Max depth                | 6                   |
| XGBoost   | Estimators               | 500                 |
| XGBoost   | Regularisation $\lambda$ | 1.0                 |
| DL Fusion | CNN backbone             | ResNet-18           |
| DL Fusion | Fusion layer             | Transformer encoder |
| DL Fusion | Dropout                  | 0.3                 |
| DL Fusion | Optimiser                | Adam, lr=1e-4       |

Table S5 | Ablation study results. Prediction error (MAE for gap, error for flow proxy) under selective removal of feature categories.

| Condition    | Gap MAE (mm) | Flow error (% change, optical flow velocity) |
|--------------|--------------|----------------------------------------------|
| All features | 0.010        | 0.18 %                                       |
| –Ridge       | 0.014        | 0.28 %                                       |
| –Reflection  | 0.0112       | 0.20 %                                       |
| –Thermal     | 0.0120       | 0.23 %                                       |

27

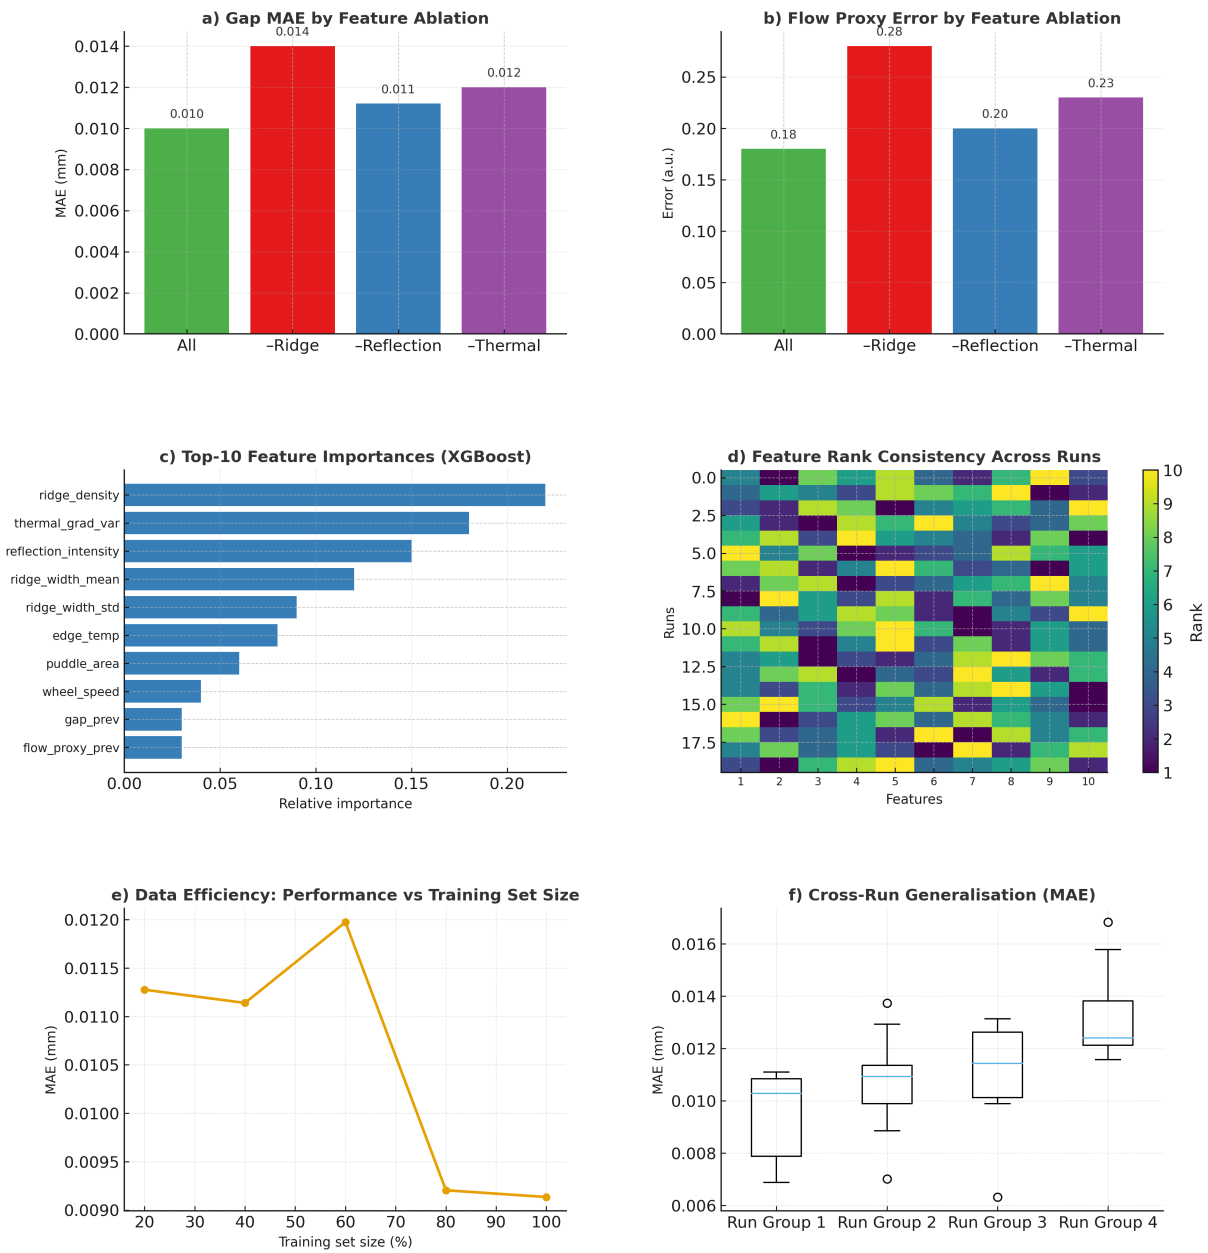

28

29 **Supplementary Figure 6 | Ablation studies and feature contribution to predictive**  
30 **performance.**

31

32 (a) Gap prediction error (MAE) under selective feature ablation shows that removal of ridge  
33 descriptors increases error by  $\approx 40\%$ , underscoring their central role. Reflection and thermal  
34 features contribute moderately, but all feature groups provide complementary value.

35

36 (b) Flow proxy error rises sharply when ridge descriptors are excluded, confirming their joint  
37 contribution with reflection and thermal cues to flow stability prediction.

38 (c) XGBoost feature-importance ranking across the top 10 descriptors highlights ridge  
39 density and thermal-gradient variance as consistently dominant, followed by reflection

intensity and ridge-width statistics.

(d) Heatmap of feature rank consistency across 20 independent runs demonstrates robustness, with ridge-related features dominating predictive influence regardless of run-to-run variability.

(e) Data efficiency curve (performance vs training set size) shows steep gains in accuracy with modest dataset fractions, followed by saturation, illustrating efficient learning from relatively small experimental datasets.

(f) Cross-run generalisation analysis (boxplots of MAE) confirms stable performance across diverse experimental conditions, with only minor variability between run groups.

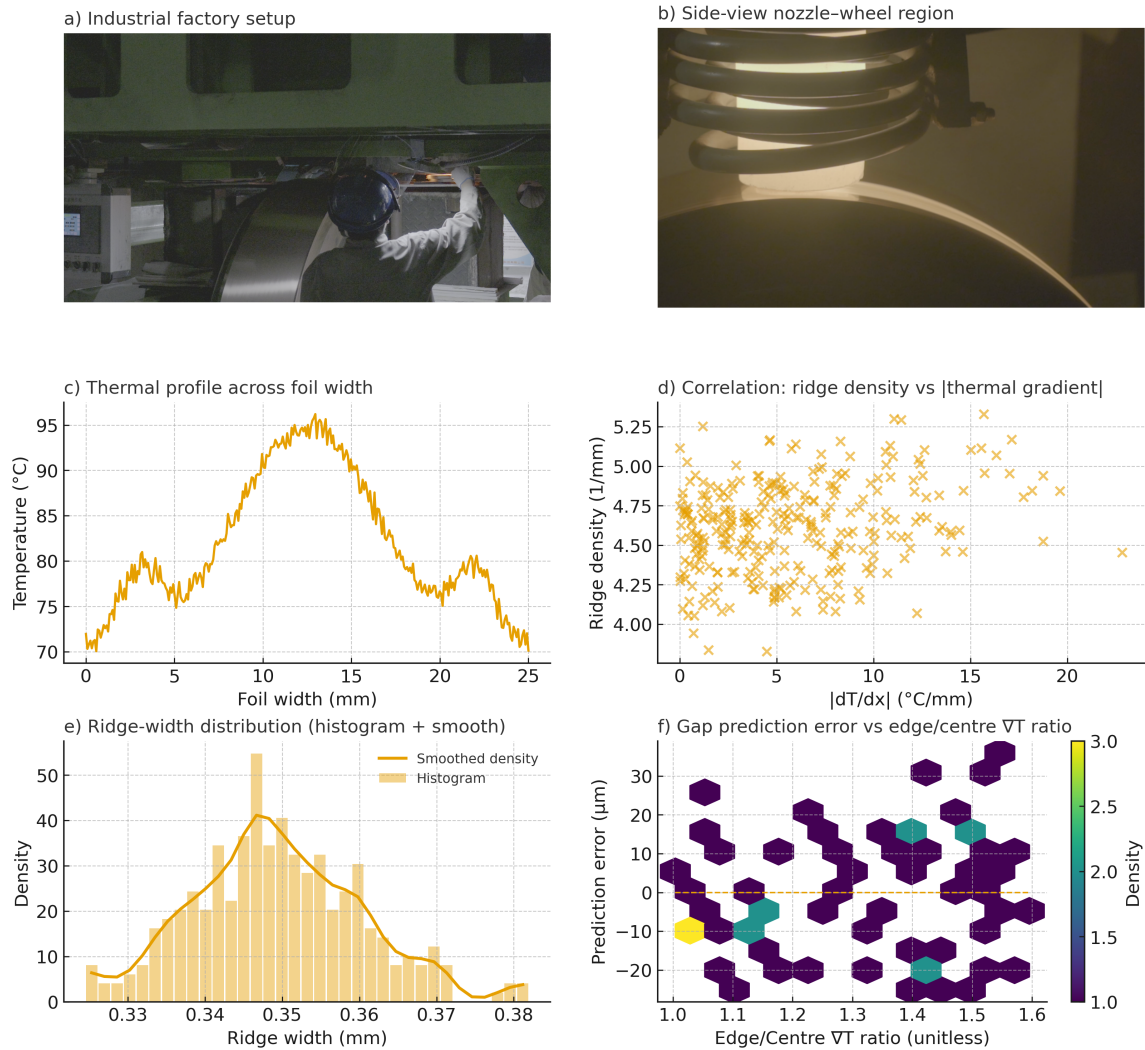

66

## 67 **Supplementary Figure 7 | Industrial factory context and advanced analytics of planar-**

## 68 **flow casting.**

69

70 (a) Photograph of the industrial planar-flow casting line used for amorphous steel foil  
71 production.

72

73 (b) Side-view of the nozzle-wheel region highlighting the melt jet impingement and foil  
74 emergence during high-speed casting.

75

76 (c) Thermal profile across foil width from infrared monitoring, showing non-uniform edge  
77 heating.

78

79 (d) Correlation between ridge density and |thermal gradient| across runs.

80

81 (e) Ridge-width distribution across casts, shown as histogram with smoothed density overlay.

82 (f) Gap prediction error versus edge-to-centre temperature gradient ratio, presented as hexbin

83 density map.

84

85    **Supplementary\_Video\_S1\_FoilTracking.mp4**

86    Automated ridge and event-tracking sequence showing foil motion and ridge detection during  
87    planar-flow casting.

88

89    **Supplementary\_Video\_S2\_ThermalGradientAnalysis.mp4**

90    Combined visualisation of thermal-gradient evolution and ridge-width variation across the  
91    foil, illustrating the link between heat imbalance and surface instability.
